# Supplementary material
Source: PubMed Central journal article supplement (PMC3321728)
Supplement: NIHMS292112-supplement-Supplementary_Figs__1-4.pdf [file NIHMS292112-supplement-Supplementary_Figs__1-4.pdf]

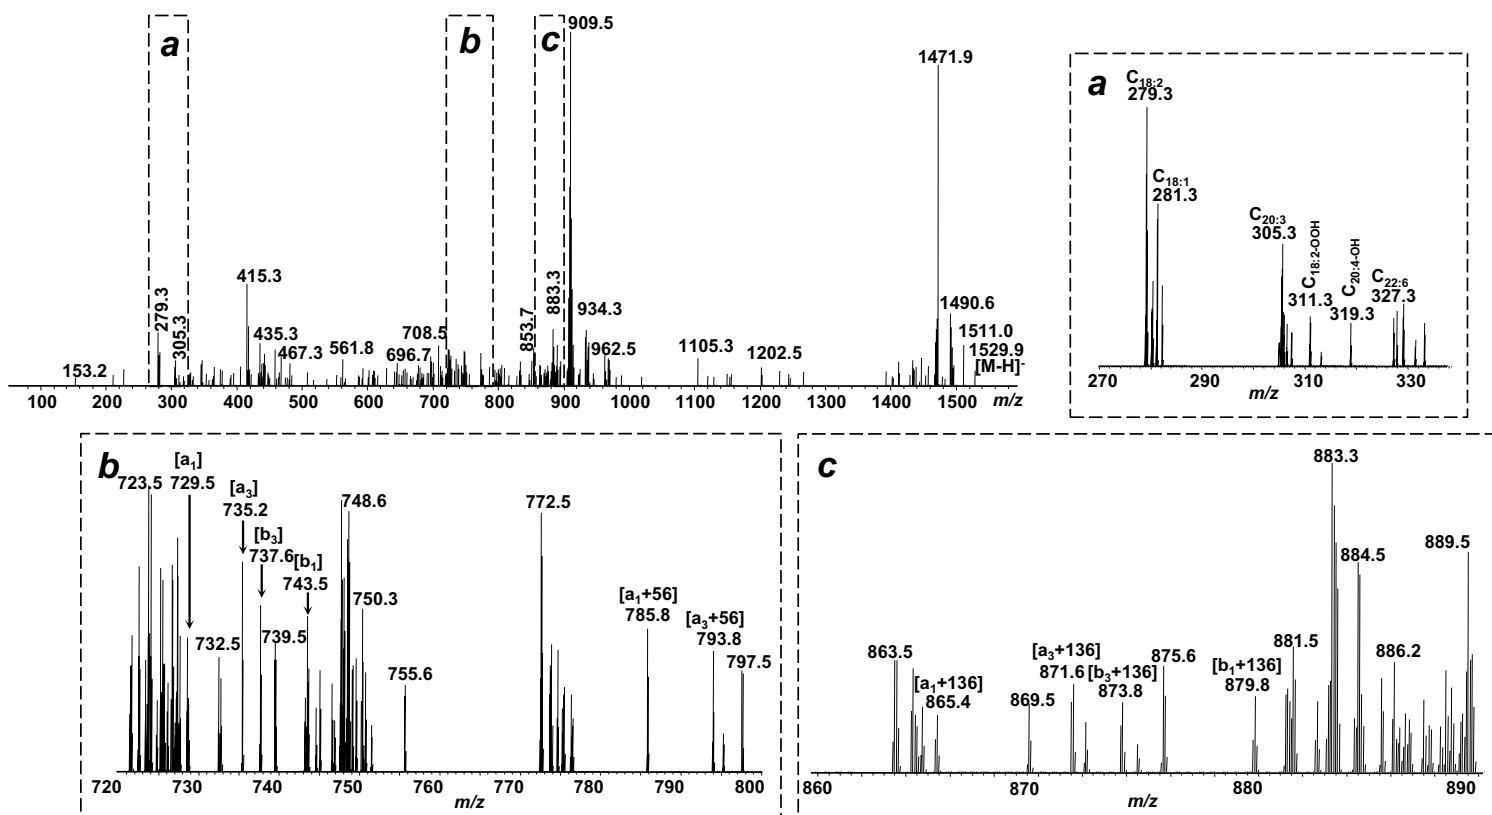

Figure S1. MS/MS fragmentation of CL species with  $m/z$  1529.9 from irradiated lung.

Two overlapping signals corresponding to molecular species of oxidized CL (CL-C<sub>18:1</sub>/C<sub>18:2-OOH</sub>/C<sub>18:1</sub>/C<sub>22:6</sub>, and CL-C<sub>18:2</sub>/C<sub>20:4-OH</sub>/C<sub>20:4-OH</sub>/C<sub>18:1</sub>) along with several non-oxidized CL were detected in MS/MS spectrum of CL molecular ion with  $m/z$  1529.9. CL-C<sub>18:1</sub>/C<sub>18:2-OOH</sub>/C<sub>18:2</sub>/C<sub>22:6</sub> ions [a<sub>1</sub>]<sup>-</sup> and [b<sub>1</sub>]<sup>-</sup> with  $m/z$  729.5 and  $m/z$  743.5, respectively corresponding to C<sub>18:1</sub>/C<sub>18:2-OOH</sub>-PA and C<sub>18:1</sub>/C<sub>22:6</sub>-PA were formed during fragmentation of the molecular ion with  $m/z$  1529.9. Additionally characteristic daughter ions [a<sub>1</sub>+56]<sup>-</sup> ( $m/z$  785.8), [a<sub>1</sub>+136]<sup>-</sup> ( $m/z$  865.6), and [b<sub>1</sub>+136]<sup>-</sup> ( $m/z$  879.8) were detected on MS/MS spectrum as well. CL-C<sub>18:2</sub>/C<sub>20:4-OH</sub>/C<sub>20:4-OH</sub>/C<sub>18:1</sub>: [a<sub>3</sub>]<sup>-</sup> and [b<sub>3</sub>]<sup>-</sup> ions with  $m/z$  735.4 and  $m/z$  737.6 corresponding to C<sub>18:2</sub>/C<sub>20:4-OOH</sub>-PA and C<sub>20:4-OH</sub>/C<sub>18:1</sub><sup>-</sup> PA as well as additional ions with  $m/z$  793.8 ([a<sub>3</sub>+56]<sup>-</sup>),  $m/z$  871.6 ([a<sub>3</sub>+136]<sup>-</sup>) and  $m/z$  873.5 ([b<sub>3</sub>+136]<sup>-</sup>) were formed after fragmentation of molecular ion with  $m/z$  1529.9. In addition, molecular ions of C<sub>18:1</sub> ( $m/z$  281.3), C<sub>18:2</sub> ( $m/z$  279.3), C<sub>18:2-OOH</sub> ( $m/z$  311.3), C<sub>20:4-OH</sub> ( $m/z$  319.3), and C<sub>22:6</sub> ( $m/z$  327.3) were present in MS/MS spectrum. Parts of MS<sup>2</sup> spectrum of the molecular ion with  $m/z$  1529.8 are shown in the ranges of  $m/z$  270 – 340 (a) in the range of  $m/z$  720 – 800 (b) and in the range of  $m/z$  860 – 890 (c).

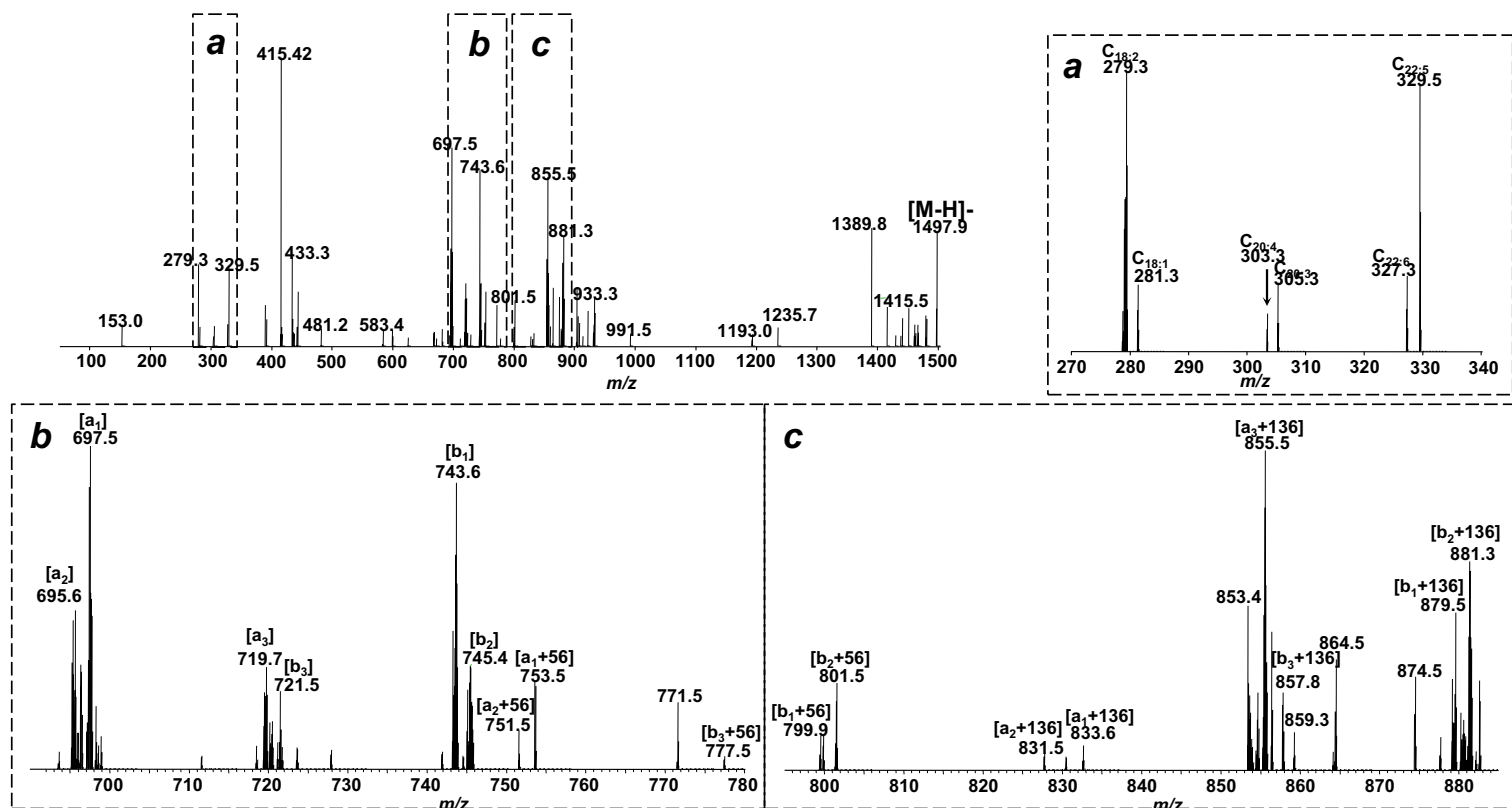

Figure S2. MS/MS fragmentation of CL species with  $m/z$  1497.9 from control lung.

Four overlapping molecular species of CL ( $\text{CL-C}_{18:1}/\text{C}_{18:2}/\text{C}_{18:2}/\text{C}_{22:6}$ ,  $\text{CL-C}_{18:2}/\text{C}_{18:2}/\text{C}_{18:2}/\text{C}_{22:5}$ ,  $\text{CL-C}_{18:2}/\text{C}_{20:4}/\text{C}_{20:3}/\text{C}_{18:2}$ , and  $\text{CL-C}_{18:2}/\text{C}_{20:4}/\text{C}_{20:4}/\text{C}_{18:1}$ ) were detected in MS/MS spectrum of CL molecular ion with  $m/z$  1497.9.  $\text{CL-C}_{18:1}/\text{C}_{18:2}/\text{C}_{18:2}/\text{C}_{22:6}$  ions  $[\text{a}_1]^-$  and  $[\text{b}_1]^-$  with  $m/z$  697.7 and  $m/z$  743.5, respectively corresponding to  $\text{C}_{18:1}/\text{C}_{18:2}$ -PA and  $\text{C}_{18:2}/\text{C}_{22:6}$ -PA were formed during fragmentation of the molecular ion with  $m/z$  1497.9. Additionally characteristic daughter ions  $[\text{a}_1+56]^-$  ( $m/z$  753.7),  $[\text{a}_1+136]^-$  ( $m/z$  833.6),  $[\text{b}_1+56]^-$  ( $m/z$  799.9), and  $[\text{b}_1+136]^-$  ( $m/z$  879.6) were detected on MS/MS spectrum as well.  $\text{CL-C}_{18:2}/\text{C}_{18:2}/\text{C}_{18:2}/\text{C}_{22:5}$ : Fragmentation analysis revealed the presence of  $[\text{a}_2]^-$  and  $[\text{b}_2]^-$  ions with  $m/z$  695.5 and  $m/z$  745.8 mainly corresponding to  $\text{C}_{18:2}/\text{C}_{18:2}$ -PA and  $\text{C}_{18:2}/\text{C}_{22:5}$ -PA. Daughter ions with  $m/z$  751.7 ( $[\text{a}_2+56]^-$ );  $m/z$  831.5 ( $[\text{a}_2+136]^-$ );  $m/z$  801.6 ( $[\text{a}_2+56]^-$  and  $881.3$  ( $[\text{b}_2+136]^-$ ) were additionally detected on MS/MS spectrum.  $\text{CL-C}_{18:2}/\text{C}_{20:4}/\text{C}_{20:3}/\text{C}_{18:2}$  and  $\text{CL-C}_{18:2}/\text{C}_{20:4}/\text{C}_{20:4}/\text{C}_{18:1}$ :  $[\text{a}_3]^-$  and  $[\text{b}_3]^-$  ions with  $m/z$  719.3 and 721.6 corresponding to  $\text{C}_{18:2}/\text{C}_{20:4}$ -PA and  $\text{C}_{20:3}/\text{C}_{18:2}$ -PA or  $\text{C}_{20:4}/\text{C}_{18:1}$ -PA as well as addition ions with  $m/z$  855.5 ( $[\text{a}_3+136]^-$ ),  $m/z$  777.5 ( $[\text{b}_3+56]^-$ ) and  $m/z$  857.5 ( $[\text{b}_3+136]^-$ ) were formed after fragmentation of molecular ion with  $m/z$  1497.9. Molecular ions with  $m/z$  415.5 and  $m/z$  417.5 were formed during fragmentation of the molecular ion with  $m/z$  1497.9 as well and corresponding to ions  $[\text{a}]^-$  and  $[\text{b}]^-$  without one fatty acid residue. In addition, molecular ions of  $\text{C}_{18:1}$  ( $m/z$  281.3),  $\text{C}_{18:2}$  ( $m/z$  279.3),  $\text{C}_{22:5}$  ( $m/z$  329.3),  $\text{C}_{20:4}$  ( $m/z$  303.3),  $\text{C}_{20:3}$  ( $m/z$  305.3) and  $\text{C}_{22:6}$  ( $m/z$  327.3) were presented in MS<sup>2</sup> spectrum as well. Parts of MS/MS spectrum of molecular ion with  $m/z$  1497.9 shown in the range of  $m/z$  270 – 340 (a) in the range of  $m/z$  690 – 780 (b) and in the range of  $m/z$  790–890 (c).

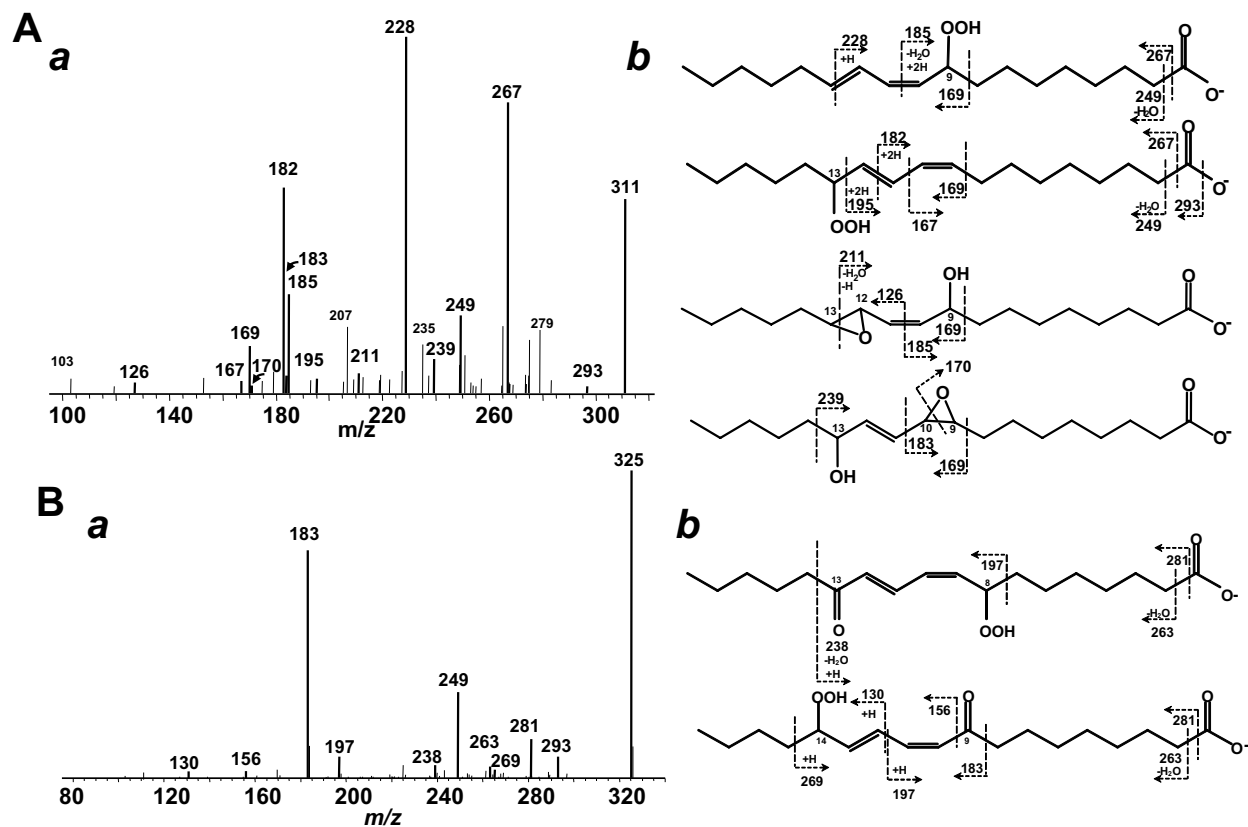

Figure S3. Identification of oxygenated fatty acids in CL obtained from the lung of mice exposed to TBI.

**A** –Typical MS/MS spectrum of oxygenated  $C_{18:2}$  with  $m/z$  311 (**a**) after CL hydrolysis by phospholipase  $A_2$ . Fragmentation pattern of molecular ion with  $m/z$  311 (**b**). **B** –Typical MS/MS spectrum of oxygenated  $C_{18:2}$  with  $m/z$  325 (**a**) after CL hydrolysis by phospholipase  $A_2$ . Fragmentation pattern of molecular ion with  $m/z$  325 (**b**).

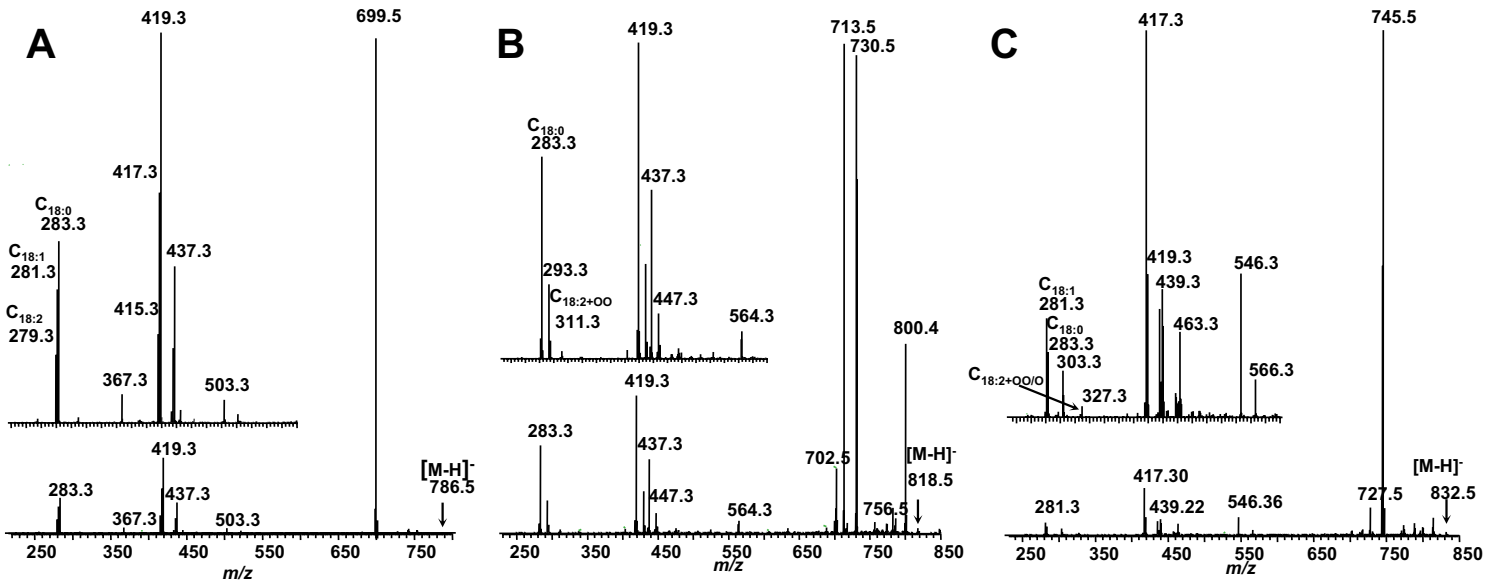

Figure S4. Identification of oxidized PS molecular species from the lung of mice exposed to TBI.

**A** – Negative ion ESI-MS/MS spectra of PS species with  $m/z$  786.5 from control lung. **B** – MS/MS fragmentation of oxidized PS molecular species with  $m/z$  818.5 from the lung of mice exposed to TBI at the dose of 10Gy. **C** – MS/MS fragmentation of oxidized PS molecular species with  $m/z$  832.5 from the lung of mice exposed to TBI at the dose of 10Gy. Part of MS/MS spectra in the range of  $m/z$  200 – 600 for the respective molecular ions is shown as an inserts. The loss of serine group of PS with  $m/z$  786.5,  $m/z$  818.5 and  $m/z$  832.5 yielded the fragments with  $m/z$  699.5,  $m/z$  731.5 and  $m/z$  745.6, respectively. Product ions with  $m/z$  419.3 originated from fragments with  $m/z$  699.5,  $m/z$  731.5 and  $m/z$  745.6 after loss of  $C_{18:2}$ , mono-hydroperoxy- $C_{18:2}$  or mono-hydroxy/mono-epoxy- $C_{18:2}$  and mono-hydroperoxy/mono-oxo- $C_{18:2}$ , respectively. Molecular ions with  $m/z$  283.3,  $m/z$  281.3 and  $m/z$  279.3 corresponding to  $C_{18:0}$ ,  $C_{18:1}$  and  $C_{18:2}$  acids, respectively were also formed during fragmentation of parent ion with  $m/z$  786.7. Fragmentation of oxidized molecular species of PS with  $m/z$  818.5 and 832.5 revealed formation of additional ions with  $m/z$  311.3 and  $m/z$  325 corresponding to mono-hydroperoxy- $C_{18:2}$  or mono-hydroxy/mono-epoxy- $C_{18:2}$  and mono-hydroperoxy/mono-oxo- $C_{18:2}$ , respectively. Daughter ions with  $m/z$  281.3 and  $m/z$  327.3 were present in spectrum of molecular ions with  $m/z$  832.5 and correspond to non-oxidized PS  $C_{18:1}/C_{22:6}$ . Thus, the molecular ion at  $m/z$  786.5 corresponds to molecular species of PS  $C_{18:0}/C_{18:2}$  whereas the molecular ions with  $m/z$  818.5 and  $m/z$  832.5 correspond to molecular species of oxidized PS  $C_{18:0}/$ mono-hydroperoxy- $C_{18:2}$  or  $C_{18:0}/$ mono-hydroxy/monio-epoxy- $C_{18:2}$  and  $C_{18:0}/$ mono-hydroperoxy/mono-oxo- $C_{18:2}$ .
